# Supplementary material
Source: Springer Nature journal article supplement (https://www.springermedizin.de/resource/supplementary/12916_2007_154_MOESM12_ESM.pdf/9599280)

**A**

## Mouse oligodendroglioma tumor-spheres

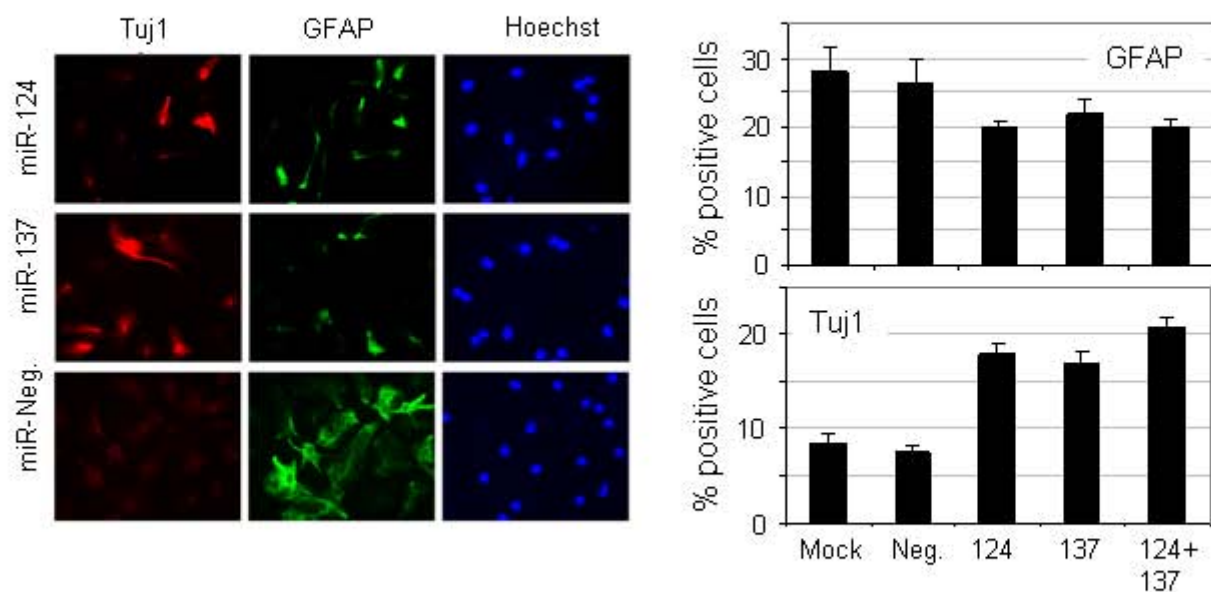**B**

## GBM tumor-spheres

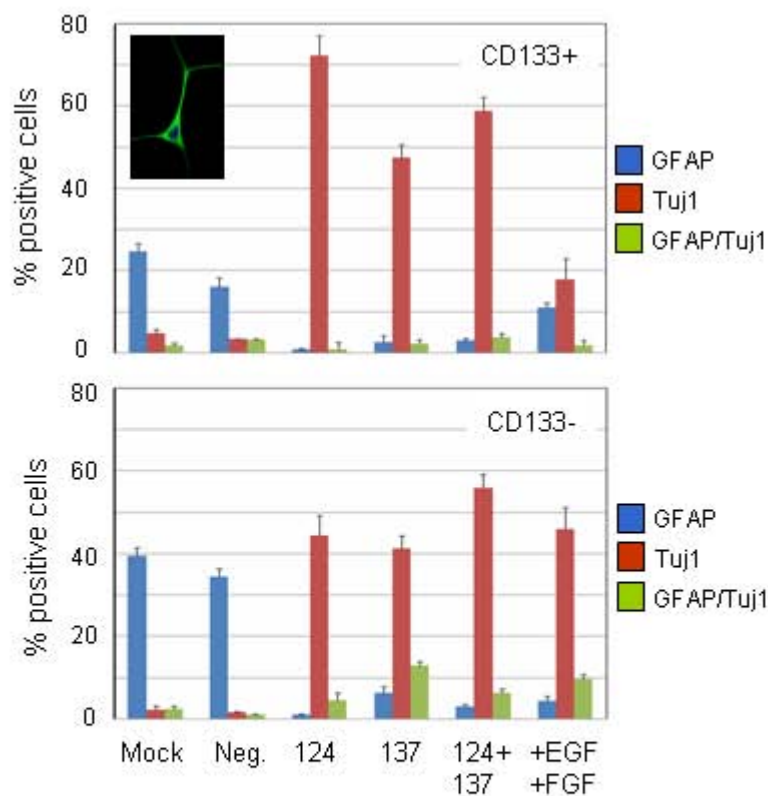**C**

## GBM tumor-spheres

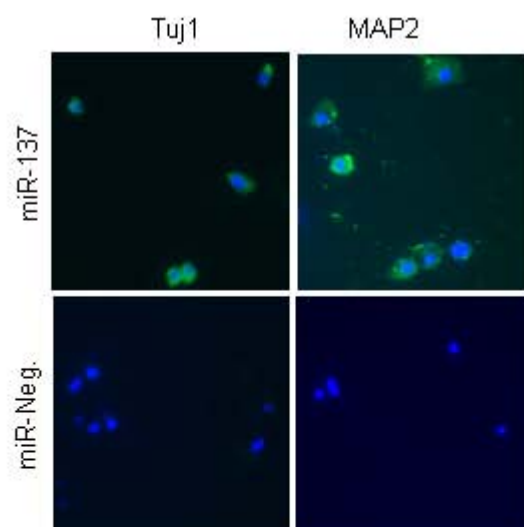

Supplement: MOESM12 [file 9599280]
